# Supplementary material for: Health Care Use and Costs of Children, Adolescents, and Young Adults With Somatic Symptom and Related Disorders
Source: PubMed Central journal article supplement (PMC7378752; doi:10.1001/jamanetworkopen.2020.11295), 2020-07-23
Supplement: jamanetwopen-3-e2011295-s001.pdf [file jamanetwopen-3-e2011295-s001.pdf]

## Supplementary Online Content

Saunders NR, Gandhi S, Chen S, et al. Health care use and costs of children, adolescents, and young adults with somatic symptom and related disorders. *JAMA Netw Open*. 2020;3(7):e2011295. doi:10.1001/jamanetworkopen.2020.11295

**eTable 1.** Data Sources

**eTable 2.** International Classification of Diseases Ninth and Tenth Revision-Canada Edition Codes Used for Case Finding of a Health Administrative Record of Somatic Symptom and Related Disorders<sup>a</sup>

**eTable 3.** Primary Discharge Diagnoses<sup>a</sup> at Index Visit

**eTable 4.** Health System Costs in the Year Before and the Year After Initial Health Record Diagnosis of Somatic Symptom and Related Disorders by Location of Initial Diagnosis, All Ages

This supplementary material has been provided by the authors to give readers additional information about their work.

| <b>eTable 1. Data Sources</b>                                                     |                                                                                                                                                                                                                                                      |                                                                                                                      |
|-----------------------------------------------------------------------------------|------------------------------------------------------------------------------------------------------------------------------------------------------------------------------------------------------------------------------------------------------|----------------------------------------------------------------------------------------------------------------------|
| <b>Data source</b>                                                                | <b>Description</b>                                                                                                                                                                                                                                   | <b>Measures</b>                                                                                                      |
| Registered Persons Database (RPDB)                                                | Provides basic demographic information about anyone who has ever received an Ontario health card number.                                                                                                                                             | Age<br>Sex<br>OHIP eligibility<br>Income quintile<br>Rurality                                                        |
| Immigration, Refugees and Citizenship Canada (IRCC)'s Permanent Resident Database | Includes immigration application records for people who initially applied to land in Ontario, since 1985. Contains permanent residents' demographic information such as country of citizenship, level of education, mother tongue, and landing date. | Immigrant category                                                                                                   |
| Ontario Health Insurance Plan (OHIP)                                              | Contains claims data paid by OHIP for services provided by all eligible health care providers including, physicians, groups, and laboratories                                                                                                        | Ambulatory (outpatient) visits<br>Physician specialty<br>Physician claims<br>OHIP diagnosis code<br>Healthcare costs |
| Discharge Abstract Database (DAD)                                                 | This database contains information about patient separations, such as clinical data (diagnoses, procedures) and resource consumption, defined using case mixed group and resource intensity weight                                                   | Acute hospitalization admissions<br>Discharge diagnosis<br>Healthcare costs                                          |
| National Ambulatory Care Reporting System (NACRS)                                 | Captures data on hospital and community based ambulatory care, notably, day surgery, outpatient clinics, and emergency departments.                                                                                                                  | Emergency department visits<br>Discharge diagnosis<br>Healthcare costs                                               |
| Ontario Mental Health Reporting System (OMHRS)                                    | Collects data on patients in adult designated inpatient mental health beds in acute and psychiatric care facilities. Capture admission and discharge dates, diagnostic information, and service use.                                                 | Inpatient psychiatric admissions<br>Discharge diagnosis<br>Healthcare costs                                          |
| Client Agency Program Enrolment (CAPE)                                            | Dataset indicates the enrolment of patients in a primary care model, enrolment status, and program type.                                                                                                                                             | Primary care program enrolment<br>Usual provider of primary care assignment<br>Healthcare costs                      |
| Corporate Provider Database (CPDB)                                                | Contains information about all physician and other providers (such as chiropractors, physiotherapists, and optometrist). Data elements include demographic characteristics, eligibility, specialty, and practice location.                           | Usual provider of primary care specialty                                                                             |
| Ontario Drug Benefit (ODB)                                                        | Contains claims for prescription drugs covered the Ontario Drug Benefit Program.                                                                                                                                                                     | Healthcare costs                                                                                                     |
| National Rehabilitation Reporting System (NRS)                                    | Contains information from inpatient rehabilitation facilities, including referral, admission and discharge records; and health and functional characteristics                                                                                        | Healthcare costs                                                                                                     |
| Continuing Care Reporting System (CCRS)                                           | Contains information on residents receiving facility-based continuing care services, including hospital-based continuing care, and residential care (long-term care).                                                                                | Healthcare costs                                                                                                     |
| Home care database (HCD)                                                          | Includes data on services provided through the Ontario Community Care Access Centres, including assessment and intake data, services, admission and discharge records.                                                                               | Healthcare costs                                                                                                     |
| Assisted Devices Program (ADP)                                                    | Contains data on Ontario residents who have long-term physical disabilities, and receive personalized assistive devices such as insulin pumps and supplies, and other equipment.                                                                     | Healthcare costs                                                                                                     |

**eTable 2.** International Classification of Diseases Ninth and Tenth Revision-Canada Edition Codes Used for Case Finding of a Health Administrative Record of Somatic Symptom and Related Disorders<sup>a</sup>

| DIAGNOSIS                                                                                         | ICD-10-CA | ICD9   | ICD-9 and 10 DESCRIPTIONS                                     | DSM-IV DESCRIPTION                                                                       |
|---------------------------------------------------------------------------------------------------|-----------|--------|---------------------------------------------------------------|------------------------------------------------------------------------------------------|
| Somatization disorder                                                                             | F45       | 300.81 | Somatization disorder                                         | Somatization disorder                                                                    |
|                                                                                                   |           | 300.82 |                                                               | Somatoform disorder - undifferentiated and NOS                                           |
|                                                                                                   |           | 300.7  | Hypochondriasis                                               |                                                                                          |
|                                                                                                   |           | 306.4  | Psychogenic gastrointestinal disease                          |                                                                                          |
|                                                                                                   |           | 307.89 | Psychogenic pain NEC                                          | Pain disorder associated with both psychological factors and a general medical condition |
|                                                                                                   |           | 306.8  | Psychogenic disorder NEC                                      |                                                                                          |
|                                                                                                   |           | 306.9  | Psychogenic disorder NOS                                      |                                                                                          |
| Conversion disorder                                                                               | F44       | 300.12 | Psychogenic amnesia                                           | Dissociative amnesia                                                                     |
|                                                                                                   |           | 300.13 | Psychogenic fugue                                             | Dissociative fugue                                                                       |
|                                                                                                   |           | 300.10 | Hysteria NOS                                                  |                                                                                          |
|                                                                                                   |           | 300.11 | Conversion disorder                                           | Conversion disorder                                                                      |
|                                                                                                   |           | 300.14 | Multiple personality                                          | Dissociative identity disorder                                                           |
|                                                                                                   |           | 300.15 | Dissociative react NOS                                        | Dissociative disorder NOS                                                                |
| Psychological and behavioural factors associated with disorders or diseases classified elsewhere  | F54       | 316    | Psychic factors associated with diseases classified elsewhere |                                                                                          |
| Unspecified behavioural syndromes associated with physiological disturbances and physical factors | F59       | 306.9  | Psychogenic disorder NOS                                      |                                                                                          |
| Factitious disorder                                                                               | F68       | 300.16 | Factitious ill w symptom                                      | Factitious disorder with predominantly psychological signs and symptoms                  |
|                                                                                                   |           | 301.51 | Chronic factitious illness with physical symptoms             |                                                                                          |
| Irritable bowel syndrome                                                                          | K58       | 564.1  | Irritable colon                                               |                                                                                          |
| Fibromyalgia                                                                                      | M79.7     | 729.1  | Myalgia and myositis NOS                                      |                                                                                          |
| Chronic intractable pain                                                                          | R52.1     | 780.9  | General symptoms NEC                                          |                                                                                          |
| Other chronic pain                                                                                | R52.2     | 780.9  | General symptoms NEC                                          |                                                                                          |
| Pain, unspecified                                                                                 | R52.9     | 780.9  | General symptoms NEC                                          |                                                                                          |
| Chronic fatigue syndrome                                                                          | F48.0     | 300.5  | Neurasthenia                                                  |                                                                                          |
|                                                                                                   | R53       | 780.79 |                                                               |                                                                                          |

NOS, Not otherwise specified; NEC, not elsewhere classifiable.

<sup>a</sup> Outpatient billings use only ICD9 codes (first three digits), hospitalization and emergency departments use ICD-10-CA codes in any position (primary diagnosis or any diagnosis contributing to length of stay).

eTable 3. Primary Discharge Diagnoses<sup>a</sup> at Index Visit

| Primary discharge diagnoses at index visit.             |              |                                                            |              |
|---------------------------------------------------------|--------------|------------------------------------------------------------|--------------|
| Index visit in emergency department                     |              | Index diagnosis during hospitalization                     |              |
| <b>All Ages</b>                                         |              |                                                            |              |
| <b>Somatization as primary diagnosis</b>                | 7,671 (57.6) | <b>Somatization as primary diagnosis</b>                   | 777 (37.6)   |
| <b>Primary diagnoses that were not SSRD</b>             | 5,639 (42.4) | <b>Primary diagnoses that were not SSRD</b>                | 1,292 (62.4) |
| Other and unspecified abdominal pain, R104              | 1,525 (27.0) | Other and unspecified abdominal pain, R104                 | 67 (5.2)     |
| Gastroenteritis and colitis of unspecified origin, A099 | 231 (4.1)    | Severe depressive episode without psychotic symptoms F322  | 36 (2.8)     |
| Constipation, K590                                      | 211 (3.7)    | Adjustment disorders, F432                                 | 21 (1.6)     |
| Low back pain, M545                                     | 188 (3.3)    | Constipation, K590                                         | 18 (1.4)     |
| Anxiety disorder, unspecified, F419                     | 176 (3.1)    | Depressive episode, unspecified, F329                      | 17 (1.3)     |
| Other                                                   | 3,308 (58.7) | Other                                                      | 1,133 (87.7) |
| <b>4 to 12 years</b>                                    |              |                                                            |              |
| <b>Somatization as primary diagnosis</b>                | 947 (58.9)   | <b>Somatization as primary diagnosis</b>                   | 151 (48.9)   |
| <b>Primary diagnoses that were not SSRD</b>             | 661 (41.1)   | <b>Primary diagnoses that were not SSRD</b>                | 158 (51.1)   |
| Other and unspecified abdominal pain, R104              | 229 (34.6)   | Other and unspecified abdominal pain, R104                 | 12 (7.6)     |
| Constipation, K590                                      | 50 (7.6)     | Constipation, K590                                         | 7 (4.4)      |
| Gastroenteritis and colitis of unspecified origin, A099 | 22 (3.3)     | Other and unspecified convulsions, R5688                   | 6 (3.8)      |
| Anxiety disorder, unspecified, F419                     | 21 (3.2)     | *Collapsed due to small cell sizes                         | n/a          |
| Headache, R51                                           | 18 (2.7)     | *Collapsed due to small cell sizes                         | n/a          |
| Other                                                   | 321 (48.6)   | Other                                                      | 133 (84.2)   |
| <b>Age 13 to 17 years</b>                               |              |                                                            |              |
| <b>Somatization as primary diagnosis</b>                | 1803 (57.4)  | <b>Somatization as primary diagnosis</b>                   | 286 (38.4)   |
| <b>Primary diagnoses that were not SSRD</b>             | 1,339 (42.6) | <b>Primary diagnoses that were not SSRD</b>                | 458 (61.6)   |
| Other and unspecified abdominal pain, R104              | 409 (30.5)   | Severe depressive episode without psychotic symptoms, F322 | 32 (7.0)     |
| Anxiety disorder, unspecified, F419                     | 49 (3.7)     | Adjustment disorders, F432                                 | 19 (4.1)     |
| Constipation, K590                                      | 47 (3.5)     | Other and unspecified abdominal pain, R104                 | 19 (4.1)     |
| Gastroenteritis and colitis of unspecified origin, A099 | 40 (3.0)     | Depressive episode, unspecified, F329                      | 14 (3.1)     |
| Headache, R51                                           | 26 (1.9)     | Headache, R51                                              | 11 (2.4)     |
| Other                                                   | 768 (57.4)   | Other                                                      | 363 (79.3)   |
| <b>Age 18 to 24 years</b>                               |              |                                                            |              |
| <b>Somatization as primary diagnosis</b>                | 4,921 (57.5) | <b>Somatization as primary diagnosis</b>                   | 340 (33.5)   |
| <b>Primary diagnoses that were not SSRD</b>             | 3,639 (42.5) | <b>Primary diagnoses that were not SSRD</b>                | 458 (66.5)   |
| Other and unspecified abdominal pain, R104              | 887 (24.4)   | Other and unspecified abdominal pain, R104                 | 36 (5.3)     |
| Gastroenteritis and colitis of unspecified origin, A099 | 169 (4.6)    | Psychotic disorder NOS, 2989                               | 11 (1.6)     |
| Low back pain, M545                                     | 162 (4.5)    | Epilepsy, unspecified, not stated as intractable, G4090    | 10 (1.5)     |
| Constipation, K590                                      | 114 (3.1)    | Mood Disorder, F39                                         | 10 (1.5)     |
| Anxiety disorder, unspecified, F419                     | 106 (2.9)    | Gastroenteritis and colitis of unspecified origin, A099    | 9 (1.3)      |
| Other                                                   | 2,201 (60.5) | Other                                                      | 600 (88.8)   |

**eTable 4.** Health system costs in year prior to and year following initial health record diagnosis of somatic symptom and related disorders by location of initial diagnosis, All ages.

| All Ages                                                |                                                          |                              |          |                                                            |                              |          |                                                          |                               |          |
|---------------------------------------------------------|----------------------------------------------------------|------------------------------|----------|------------------------------------------------------------|------------------------------|----------|----------------------------------------------------------|-------------------------------|----------|
| Diagnostic setting                                      |                                                          |                              |          |                                                            |                              |          |                                                          |                               |          |
|                                                         | First diagnosis of somatization in an outpatient setting |                              |          | First diagnosis of somatization in an emergency department |                              |          | First diagnosis of somatization during a hospitalization |                               |          |
|                                                         | N = 17 893                                               |                              |          | N = 13 310                                                 |                              |          | N = 2069                                                 |                               |          |
| Health System Costs                                     | One year prior to diagnosis                              | One year following diagnosis | <i>p</i> | One year prior to diagnosis                                | One year following diagnosis | <i>p</i> | One year prior to diagnosis                              | One year following diagnosis  | <i>p</i> |
| <b>OVERALL HEALTH SYSTEM COSTS (CANADIAN DOLLARS)</b>   |                                                          |                              |          |                                                            |                              |          |                                                          |                               |          |
| Mean ± SD                                               | 2,367.82 ± 10,664.70                                     | 2,881.79 ± 28,243.13         | 0.01     | 4,325.58 ± 15,618.16                                       | 5,236.34 ± 14,565.59         | <0.00    | 31,988.77 ± 72,979.52                                    | 19,434.98 ± 43,142.99         | <0.001   |
| Median (IQR)                                            | 573.43 (269.33-1,434.97)                                 | 560.82 (234.65-1,518.40)     |          | 1,550.22 (799.81-3,451.59)                                 | 1,719.79 (636.55-4,455.38)   |          | 14,094.56 (9,009.61-26,654.52)                           | 4,960.31 (1,658.48-16,373.68) |          |
| <b>HEALTH SYSTEM COSTS BY SECTOR (CANADIAN DOLLARS)</b> |                                                          |                              |          |                                                            |                              |          |                                                          |                               |          |
| <b>Hospitalizations</b>                                 |                                                          |                              |          |                                                            |                              |          |                                                          |                               |          |
| Mean ± SD                                               | 528.43 ± 4,948.25                                        | 830.91 ± 25,695.33           | 0.10     | 1,010.38 ± 10,356.85                                       | 1,273.74 ± 7,496.81          | 0.01     | 17,509.97 ± 58,896.48                                    | 7,499.04 ± 25,457.08          | <0.001   |
| Median (IQR)                                            | -                                                        | -                            |          | -                                                          | -                            |          | 7,219.62 (3,616.14-13,337.14)                            | 0.00 (0.00-4,818.69)          |          |
| <b>Emergency department visits</b>                      |                                                          |                              |          |                                                            |                              |          |                                                          |                               |          |
| Mean ± SD                                               | 181.02 ± 552.16                                          | 168.18 ± 599.84              | 0.001    | 900.77 ± 1,319.99                                          | 685.92 ± 1,605.42            | <0.00    | 1,603.74 ± 1,864.79                                      | 1,030.13 ± 2,026.63           | <0.001   |
| Median (IQR)                                            | 0.00 (0.00-174.20)                                       | 0.00 (0.00-162.57)           |          | 553.11 (298.97-1,046.45)                                   | 254.04 (0.00-778.71)         |          | 1,171.82 (635.91-1,998.46)                               | 411.81 (0.00-1,263.71)        |          |
| <b>Physician billings</b>                               |                                                          |                              |          |                                                            |                              |          |                                                          |                               |          |
| Mean ± SD                                               | 786.67 ± 1,556.25                                        | 838.84 ± 2,200.22            | 0.001    | 1,173.11 ± 2,086.37                                        | 1,457.59 ± 2,788.08          | <0.00    | 4,867.65 ± 6,687.54                                      | 3,642.72 ± 8,405.73           | <0.001   |
| Median (IQR)                                            | 355.97 (186.25-758.62)                                   | 342.92 (159.26-788.62)       |          | 613.49 (297.92-1,301.67)                                   | 772.98 (334.09-1,644.67)     |          | 3,063.04 (1,765.80-5,381.66)                             | 1,711.18 (725.47-3,798.28)    |          |
| <b>Mental health hospitalizations</b>                   |                                                          |                              |          |                                                            |                              |          |                                                          |                               |          |
| Mean ± SD                                               | 248.41 ± 4,909.17                                        | 412.52 ± 7,195.81            | <0.00    | 279.08 ± 3,854.67                                          | 488.86 ± 5,318.77            | <0.00    | 3,810.01 ± 20,991.49                                     | 2,146.85 ± 15,358.38          | <0.001   |
| Median (IQR)                                            | -                                                        | -                            |          | -                                                          | -                            |          | -                                                        | -                             |          |
| <b>All other sectors</b>                                |                                                          |                              |          |                                                            |                              |          |                                                          |                               |          |
| Mean ± SD                                               | 623.29 ± 4,533.96                                        | 631.34 ± 2,560.12            | 0.80     | 962.23 ± 4,744.59                                          | 1,330.23 ± 4,990.01          | <0.00    | 4,197.41 ± 14,672.20                                     | 5,116.25 ± 17,458.49          | <0.001   |
| Median (IQR)                                            | 100.92 (20.81-377.91)                                    | 88.46 (0.00-398.85)          |          | 147.03 (27.11-757.02)                                      | 360.35 (47.54-1,342.88)      |          | 1,177.86 (405.89-3,168.65)                               | 1,345.27 (365.65-3,746.23)    |          |
